# Supplementary material for: Metabolomics-Based Profiling via a Chemometric Approach to Investigate the Antidiabetic Property of Different Parts and Origins of Pistacia lentiscus L.
Source: MDPI journal article supplement (doi:10.3390/metabo13020275), 2023-02-14
Supplement: s1 [file s1]

## Article

# Metabolomics-based profiling via a chemometric approach to investigate the antidiabetic property of different parts and origins of *Pistacia lentiscus* L.

Chabha SEHAKI<sup>1,2</sup>, Roland MOLINIE<sup>1</sup>, David MATHIRON<sup>3</sup>, Jean-Xavier FONTAINE<sup>1</sup>, Nathalie JULLIAN<sup>1</sup>, Fadila AYATI<sup>2</sup>, Farida FERNANE<sup>2</sup>, Eric GONTIER<sup>1,\*</sup>

<sup>1</sup>BIOPIC-UPJV Laboratory UMRT BioEcoAgro INRAE1158, SFR Condorcet FR CNRS 3417, UFR of Sciences, University of Picardie Jules Verne, 33 Rue Saint Leu, 80000 Amiens, France

<sup>2</sup>Laboratory of Natural Resources, University Mouloud Mammeri of Tizi-Ouzou, Tizi-Ouzou 15000, Algeria

<sup>3</sup>Analytical platform, UFR of Sciences, University of Picardie Jules Verne, 33 Rue Saint Leu, 80000 Amiens, France

\* Correspondence:eric.gontier@u-picardie.fr; Tel: +00(33)6 59 21 81 08

**Supplementary Materials:** The following supporting information can be downloaded at: [www.mdpi.com/xxx/s1](http://www.mdpi.com/xxx/s1), **Figure S1:** Boxplot showing the  $\alpha$ -glucosidase inhibitory effect of lentisk leaves, stems barks and fruits from the mountain and littoral; **Figure S2:** Contribution of the two blocks (neg and pos) to the constitution of the OPLS model; **Table S1:** Weather data collected between 1999 and 2019 at AitTrane, Algeria; **Table S2:** Weather data collected between 1999 and 2019 at Tigzirt, Algeria. **Table S3:** Metabolomic data (OPLS, matrix-negative ionization); **Table S4:** Metabolomic data (OPLS, matrix-positive ionization); **Table S5:** UHPLC-ESI-HRMS data results and OPLS coordinates; **Table S6:** Phenolic compounds identified in *P. lentiscus* extracts by UHPLC-ESI-HRMS in the positive mode.

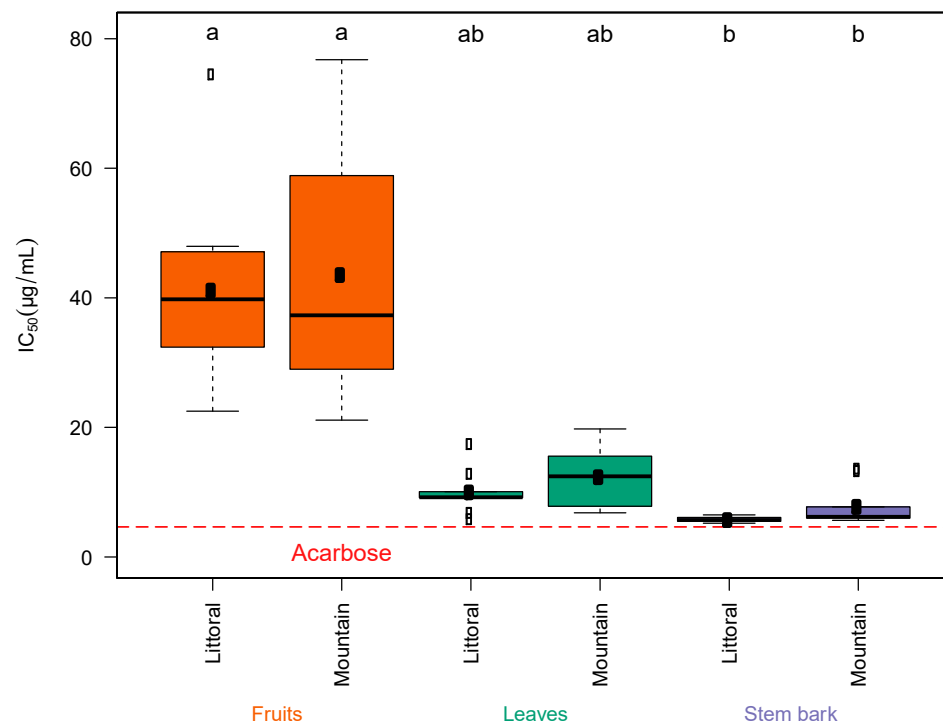

**Figure S1.** Boxplot showing the  $\alpha$ -glucosidase inhibitory effect of lentisk leaves, stems barks and fruits from the mountain and littoral.

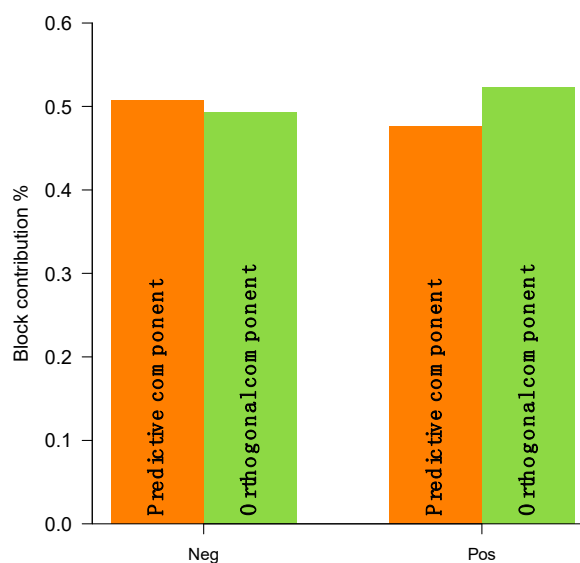

**Figure S2.** Contribution of the two blocks (neg and pos) to the constitution of the OPLS model.

|                               | January | February | March | April | May  | June | July | August | September | October | November | December |
|-------------------------------|---------|----------|-------|-------|------|------|------|--------|-----------|---------|----------|----------|
| Mean temperature (°C)         | 5.2     | 5.3      | 8.5   | 11.6  | 15.6 | 20.8 | 24.8 | 24.5   | 20        | 15.9    | 9.4      | 6.2      |
| Mean minimum temperature (°C) | 0.8     | 0.5      | 3.1   | 5.8   | 9.4  | 13.9 | 17.5 | 17.8   | 14.5      | 10.7    | 5.2      | 2.1      |
| Maximum temperature (°C)      | 10.4    | 10.7     | 14.3  | 17.5  | 21.6 | 27.4 | 31.9 | 31.6   | 26.3      | 21.9    | 14.5     | 11.2     |
| Precipitation (mm)            | 88      | 78       | 84    | 86    | 74   | 21   | 8    | 19     | 53        | 60      | 81       | 82       |
| Humidity (%)                  | 79      | 77       | 73    | 70    | 67   | 55   | 45   | 47     | 59        | 64      | 75       | 79       |
| Rainy days (jree)             | 9       | 8        | 8     | 8     | 7    | 3    | 2    | 4      | 7         | 7       | 9        | 8        |
| Hours of sunshine (h)         | 5.7     | 6.4      | 7.6   | 9     | 10.3 | 12.3 | 12.6 | 11.7   | 9.9       | 8.4     | 6.4      | 5.7      |

Table S2. Weather data collected between 1999 and 2019 at Tizirt, Algeria.

(from <https://fr.climate-data.org/afrique/algerie/tizi-ouzou/tigzirt-321206/> )

|                               | January | February | March | April | May  | June | July | August | September | October | November | December |
|-------------------------------|---------|----------|-------|-------|------|------|------|--------|-----------|---------|----------|----------|
| Mean temperature (°C)         | 10.2    | 10       | 12.1  | 14.2  | 17.1 | 21.1 | 24.4 | 25     | 22.3      | 19.3    | 14.1     | 11.3     |
| Mean minimum temperature (°C) | 7.7     | 7.4      | 9.3   | 11.3  | 14.1 | 17.9 | 21.2 | 22     | 19.6      | 16.5    | 11.7     | 8.9      |
| Maximum temperature (°C)      | 12.8    | 12.7     | 14.8  | 16.8  | 19.7 | 23.9 | 27.3 | 27.9   | 25        | 22.2    | 16.8     | 13.9     |
| Precipitation (mm)            | 142     | 107      | 86    | 68    | 51   | 9    | 2    | 6      | 36        | 73      | 140      | 146      |
| Humidity(%)                   | 75      | 74       | 75    | 77    | 77   | 72   | 69   | 69     | 71        | 71      | 73       | 74       |
| Rainy days (jree)             | 10      | 8        | 7     | 6     | 4    | 1    | 0    | 1      | 4         | 6       | 10       | 10       |
| Hours of sunshine (h)         | 7       | 7.8      | 9     | 10.2  | 11.1 | 12.2 | 12.3 | 11.3   | 10.1      | 9.1     | 7.6      | 7        |

**Table S6.** Phenolic compounds identified in *Pistacia lentiscus* extracts by UHPLC-ESI-HRMS in the positive mode.

| N°<br>Metabolite | RT<br>(min) | m/z (obs)<br>(M-H) <sup>+</sup> | Error<br>(ppm) | HDMS <sup>E</sup> fragment ions<br>(Intensity, %)                                   | Molecular<br>formula                            | Suggested compound                                             |
|------------------|-------------|---------------------------------|----------------|-------------------------------------------------------------------------------------|-------------------------------------------------|----------------------------------------------------------------|
| 1                | 0.45        | 611.1391                        | -0.59          | 425.08572<br>(42.86), 299.05412 (66.25),<br>263.05419 (43.44), 175.03792<br>(20.42) | C <sub>30</sub> H <sub>26</sub> O <sub>14</sub> | Epigallocatechin(4a>8)epigallocatechin                         |
| 3                | 0.56        | 763.1505                        | -0.29          | 425.08596 (28.64), 299.05476 (2<br>3.31),                                           | C <sub>37</sub> H <sub>30</sub> O <sub>18</sub> | (Epi)gallocatechin-3'-Ogalloyl-<br>(epi)gallocatechin          |
| 4                | 0.61        | 611.1383                        | -1.99          | 425.08572 (42.86), 299.0542<br>(66.25), 263.05419 (43.44)                           | C <sub>30</sub> H <sub>26</sub> O <sub>14</sub> | Epigallocatechin(4a->8)epigallocate-<br>chin (isomer)          |
| 5                | 0.72        | 763.1504                        | 0.31           | /                                                                                   | C <sub>37</sub> H <sub>30</sub> O <sub>18</sub> | (Epi)gallocatechin-3'-Ogalloyl-<br>(epi)gallocatechin (isomer) |
